# Supplementary material for: Tumor-targeting polymer nanohybrids with amplified ROS generation for combined photodynamic and chemodynamic therapy
Source: Royal Society of Chemistry journal article supplement (doi:10.1039/d3tb02341a), 2023-12-20
Supplement: d3tb02341a1.pdf [file d3tb02341a1.pdf]

## Supplementary information

### Tumor-Targeting Polymer Nanohybrids with Amplified ROS Generation for Photodynamic-Combination Chemodynamic Therapy

Xiaodan Chen,<sup>‡a,b</sup> Danling Cheng,<sup>‡c</sup> Ningyue Yu,<sup>c</sup> Jian Feng,<sup>c</sup> Jingchao Li,<sup>\*c</sup> Lin Lin<sup>\*b</sup>

<sup>a</sup> Department of Radiology, Clinical Oncology School of Fujian Medical University, Fujian Cancer Hospital, Fuzhou 350014, China

<sup>b</sup> Department of Radiology, Fujian Medical University Union Hospital, Fuzhou 350001, China. Email: [linlin@fjmu.edu.cn](mailto:linlin@fjmu.edu.cn)

<sup>c</sup> College of Biological Science and Medical Engineering, Donghua University, Shanghai 201620, China. Email: [jcli@dhu.edu.cn](mailto:jcli@dhu.edu.cn)

<sup>‡</sup> Contributed equally to this work.

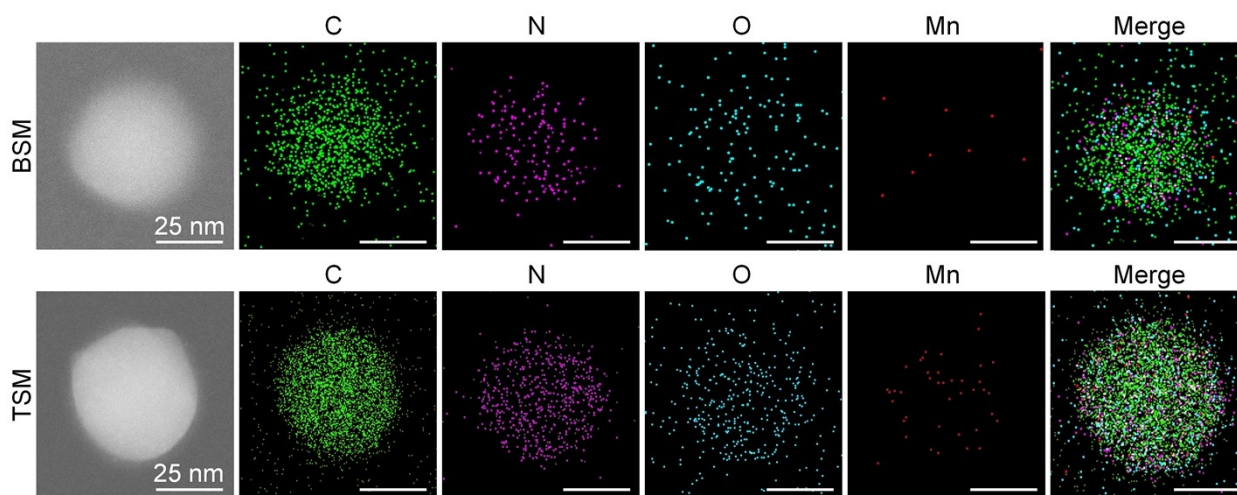

**Fig. S1.** Elemental mapping images of BSM and TSM.

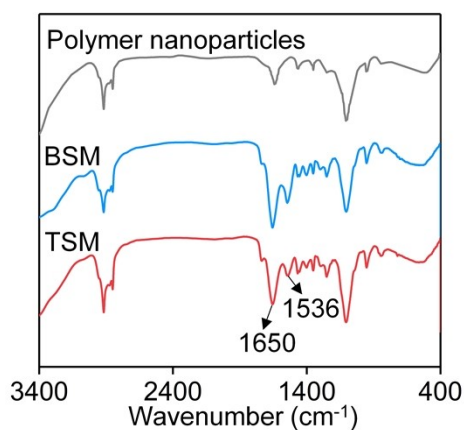

**Fig. S2.** FTIR spectra of polymer nanoparticles, BSM and TSM.

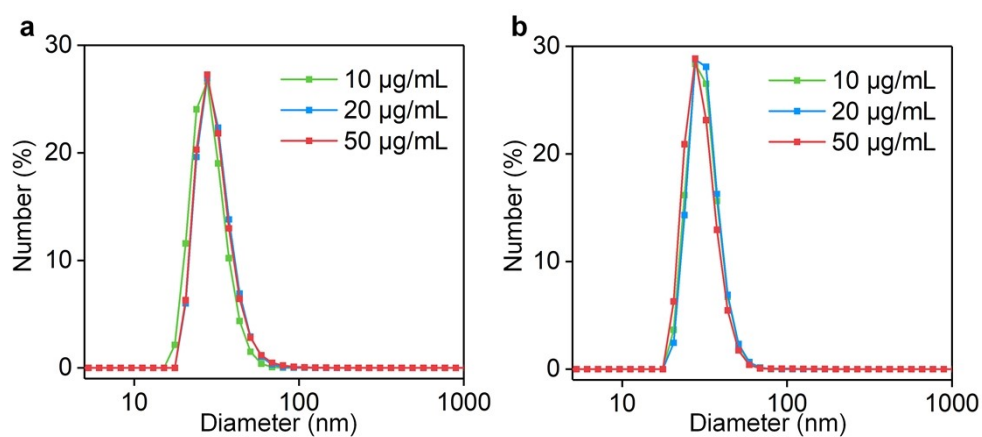

**Fig. S3.** Hydrodynamic diameter profiles of (a) BSM and (b) TSM at the different concentrations of 10, 20 and 50  $\mu\text{g}/\text{mL}$ .

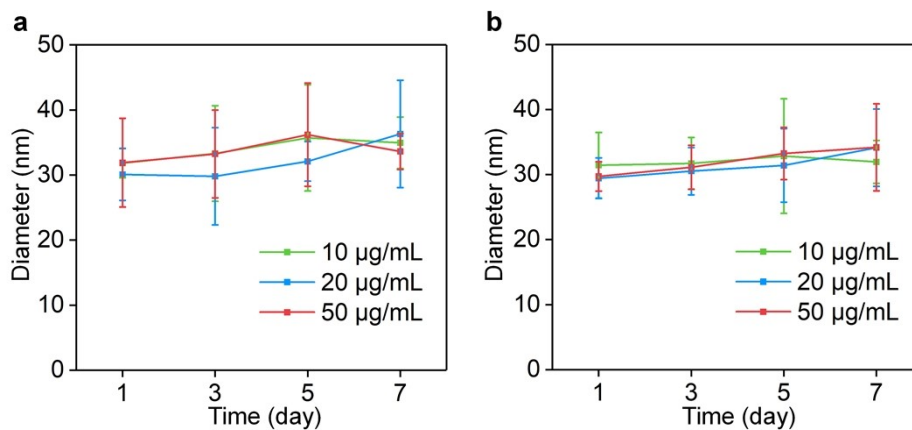

**Fig. S4.** Hydrodynamic diameters of (a) BSM and (b) TSM at the different concentrations after storage for 1, 3, 5 and 7 days.

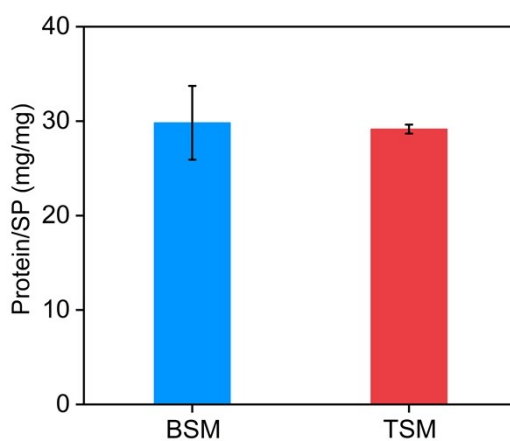

**Fig. S5.** Amount of protein on surface of nanoparticles measured via BCA protein quantification analysis.

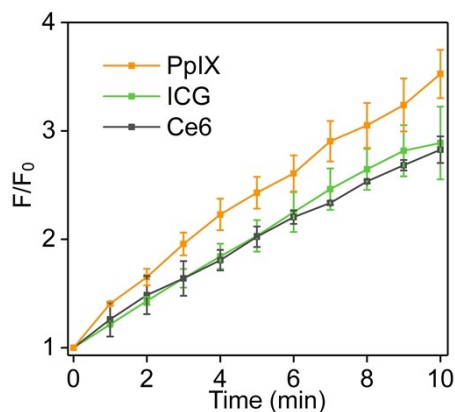

**Fig. S6.** The  $^1O_2$  generation evaluation for SOSG solutions containing PpIX, ICG and Ce6 after 808 nm laser irradiation by measuring the fluorescence enhancement ( $F/F_0$ ).

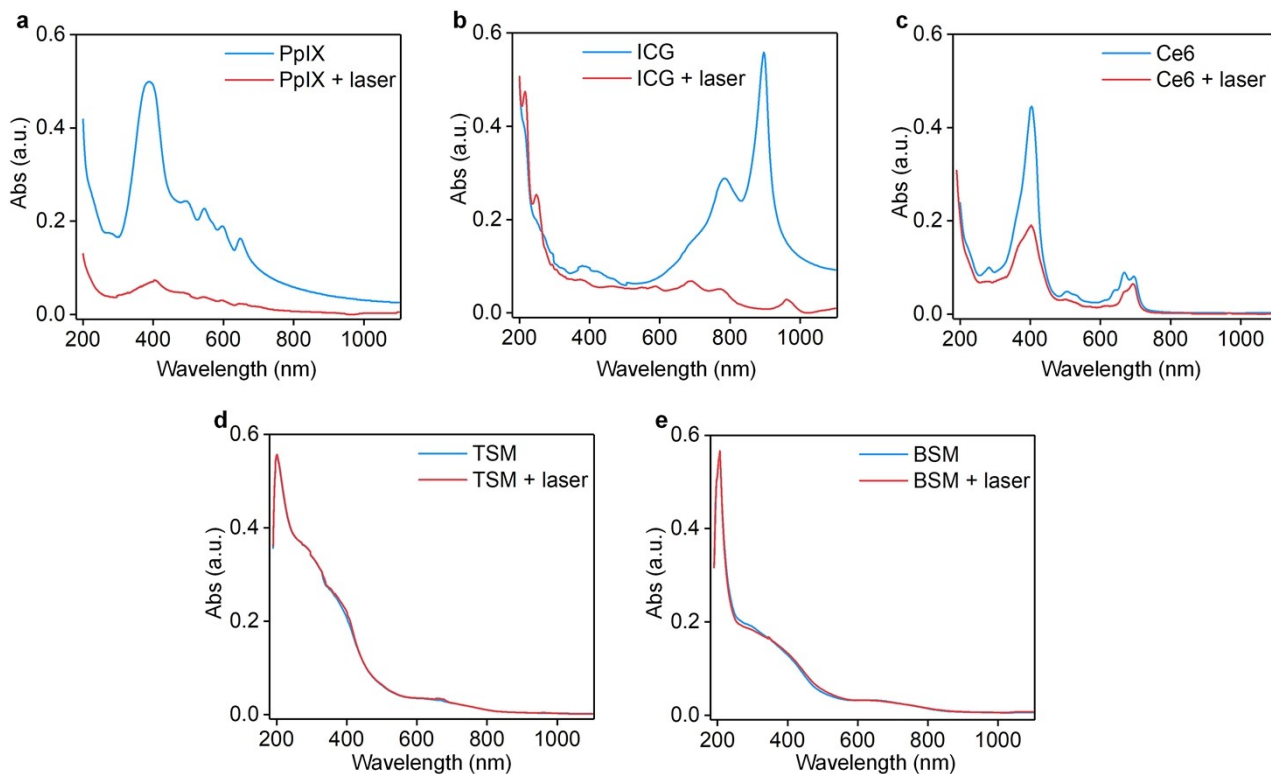

**Fig. S7.** The UV-vis absorbance spectra of (a) PpIX, (b) ICG, (c) Ce6, (d) TSM and (e) BSM before and after laser irradiation for 10 min.

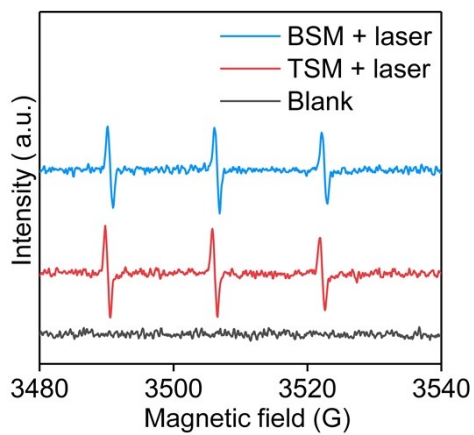

**Fig. S8.** ESR spectra of the generated  $^1\text{O}_2$  for blank, BSM and TSM after laser irradiation.

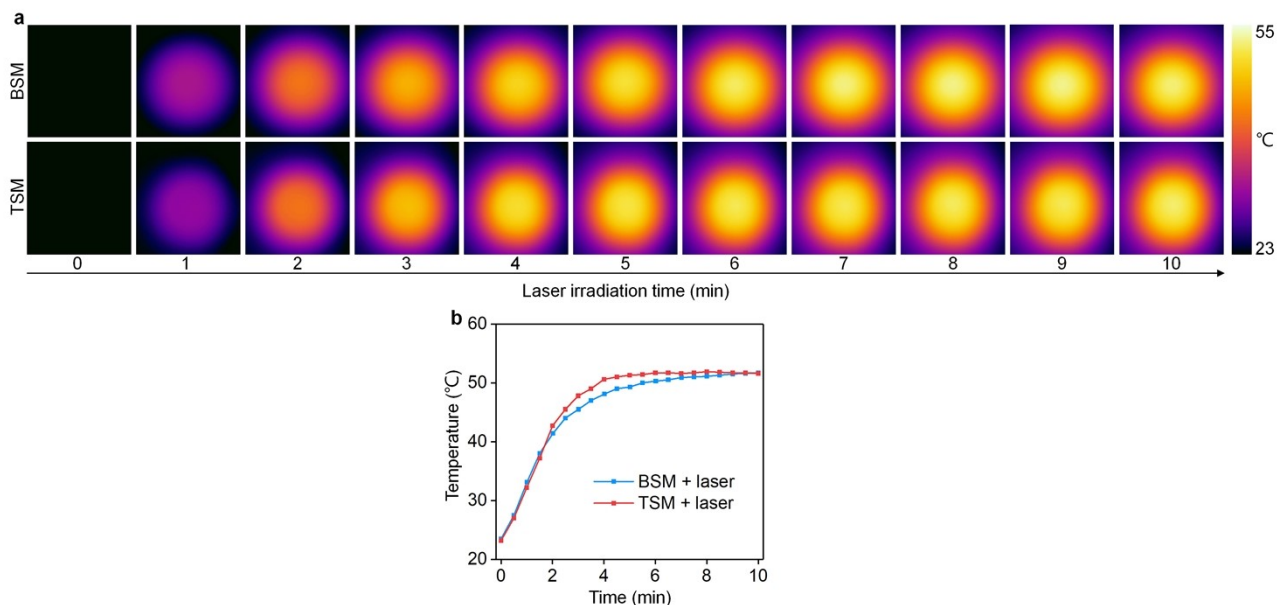

**Fig. S9.** (a) Thermal images of solutions containing BSM and TSM under 808 nm laser irradiation for different times. (b) Temperatures of solutions containing BSM and TSM under laser irradiation.

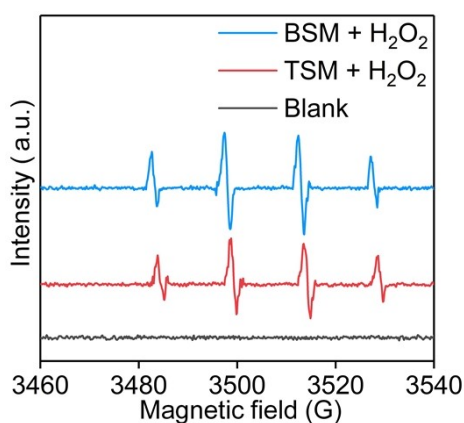

**Fig. S10.** ESR spectra of the generated  $\cdot\text{OH}$  for blank, BSM and TSM after incubation with H<sub>2</sub>O<sub>2</sub> and GSH.

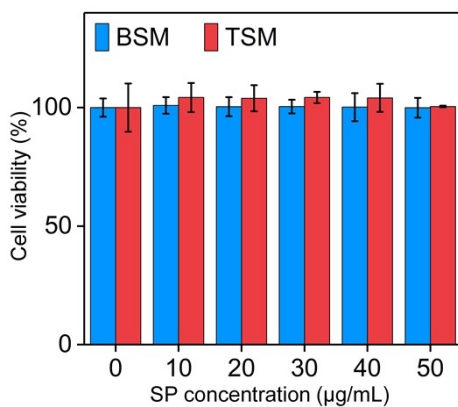

**Fig. S11.** Cell viability analysis of BSM- and TSM-treated 4T1 cells at different SP concentrations for 24 h (n = 5).

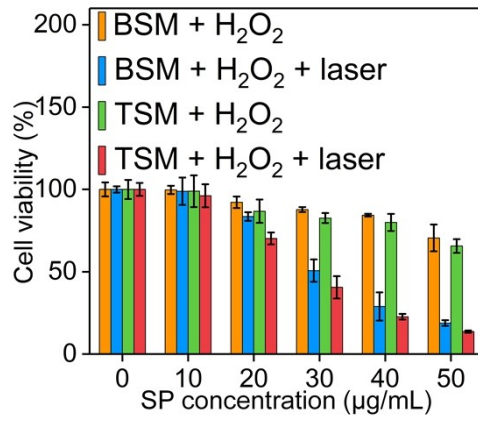

**Fig. S12.** Cell viability analysis of BSM- and TSM-treated 4T1 cells at various SP concentrations (n = 5) in the presence of H<sub>2</sub>O<sub>2</sub> without or with 808 nm laser irradiation (1 W/cm<sup>2</sup>, 5 min).

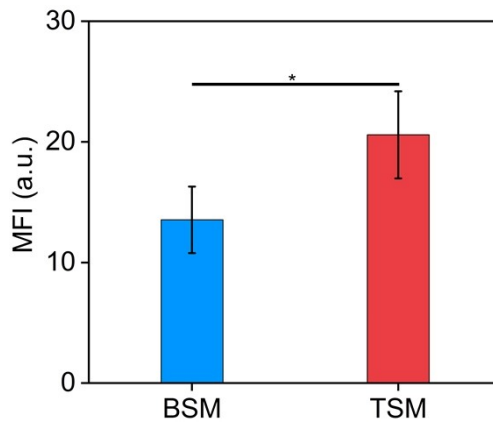

**Fig. S13.** Mean fluorescence intensity of BSM- and TSM-treated 4T1 cells (n = 3).

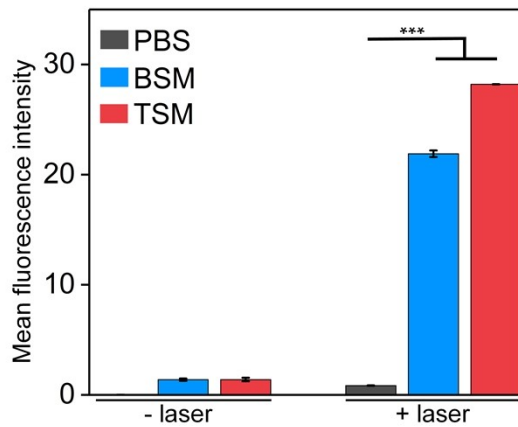

**Fig. S14.** Mean fluorescence intensity of ROS signals inside 4T1 cells after different treatments to evaluate the intracellular ROS generation (n = 3).

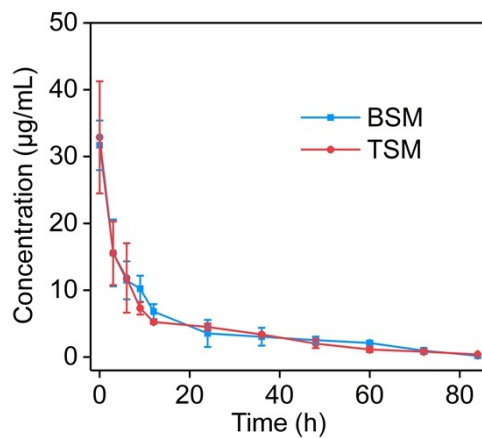

**Fig. S15.** Pharmacokinetic analysis of BSM and TSM after intravenous injection to tumor-bearing mice.

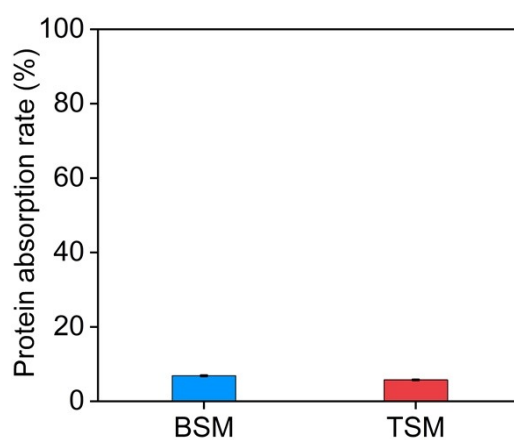

**Fig. S16.** Protein absorption analysis for BSM and TSM after incubation with BSA.

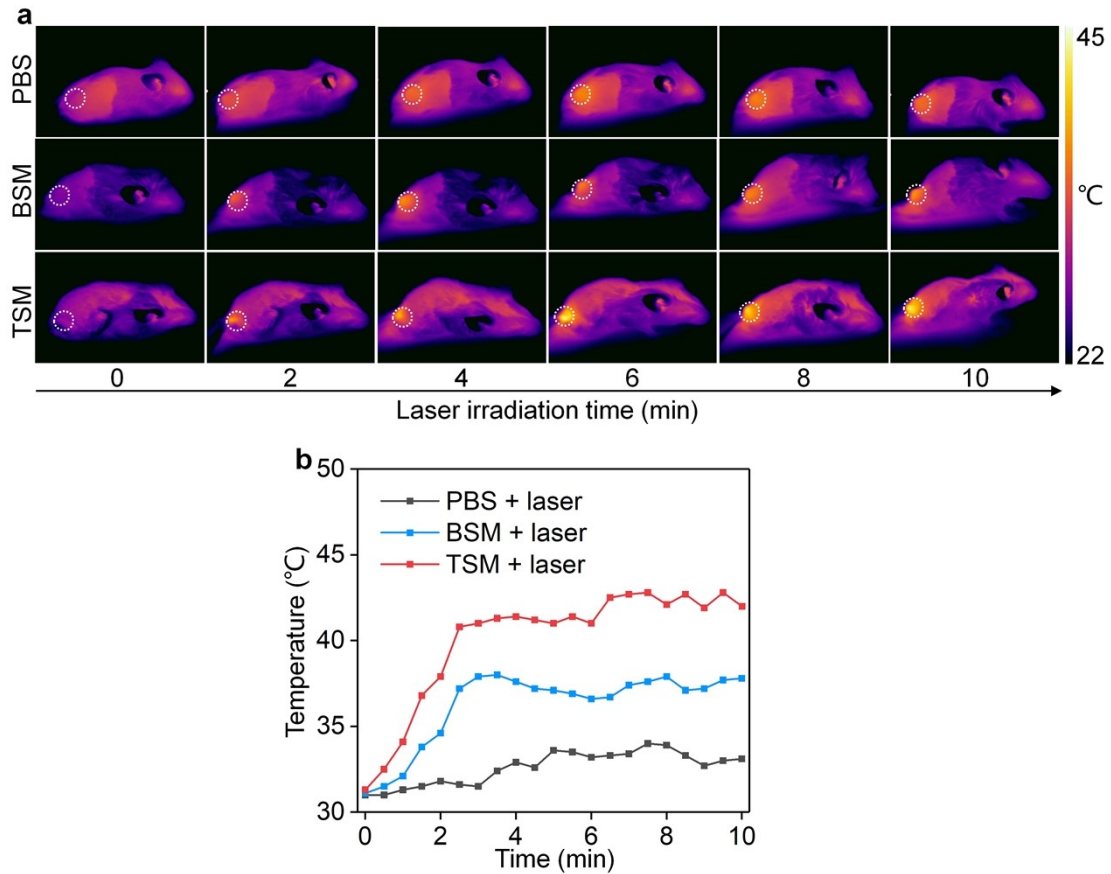

**Fig. S17.** (a) Thermal images of tumor-bearing mice after intravenous injection of PBS, BSM and TSM with laser irradiation for different time. (b) Temperatures of tumors under laser irradiation.

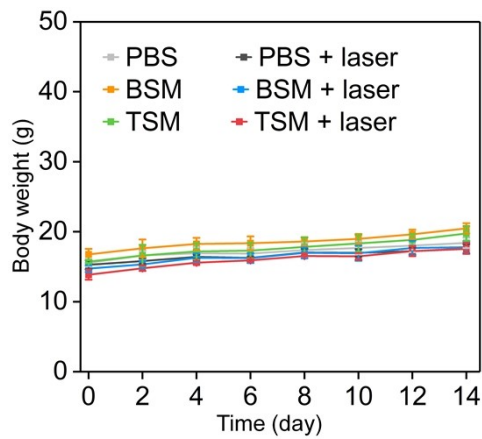

**Fig. S18.** Body weights of 4T1 tumor-bearing mice after intravenous injection of PBS, BSM and TSM with or without laser irradiation from 0 to 14 days (n = 4).



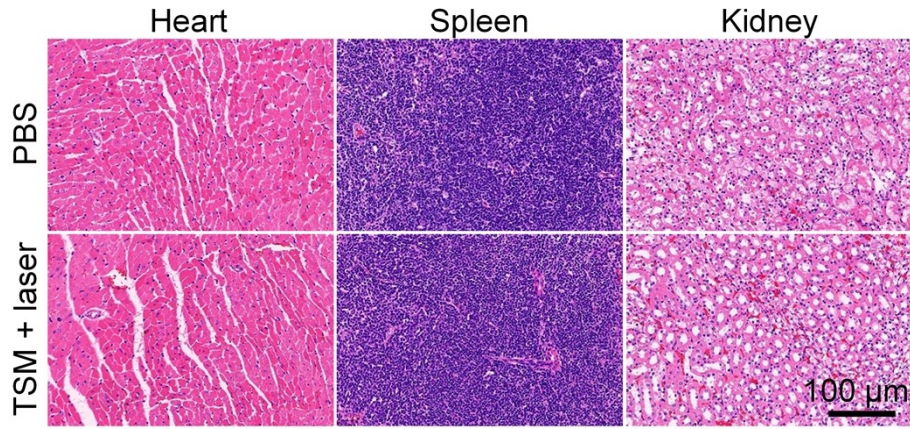

**Fig. S19.** Representative H&E staining images of heart, spleen, and kidney of mice in PBS control and TSM + laser groups.

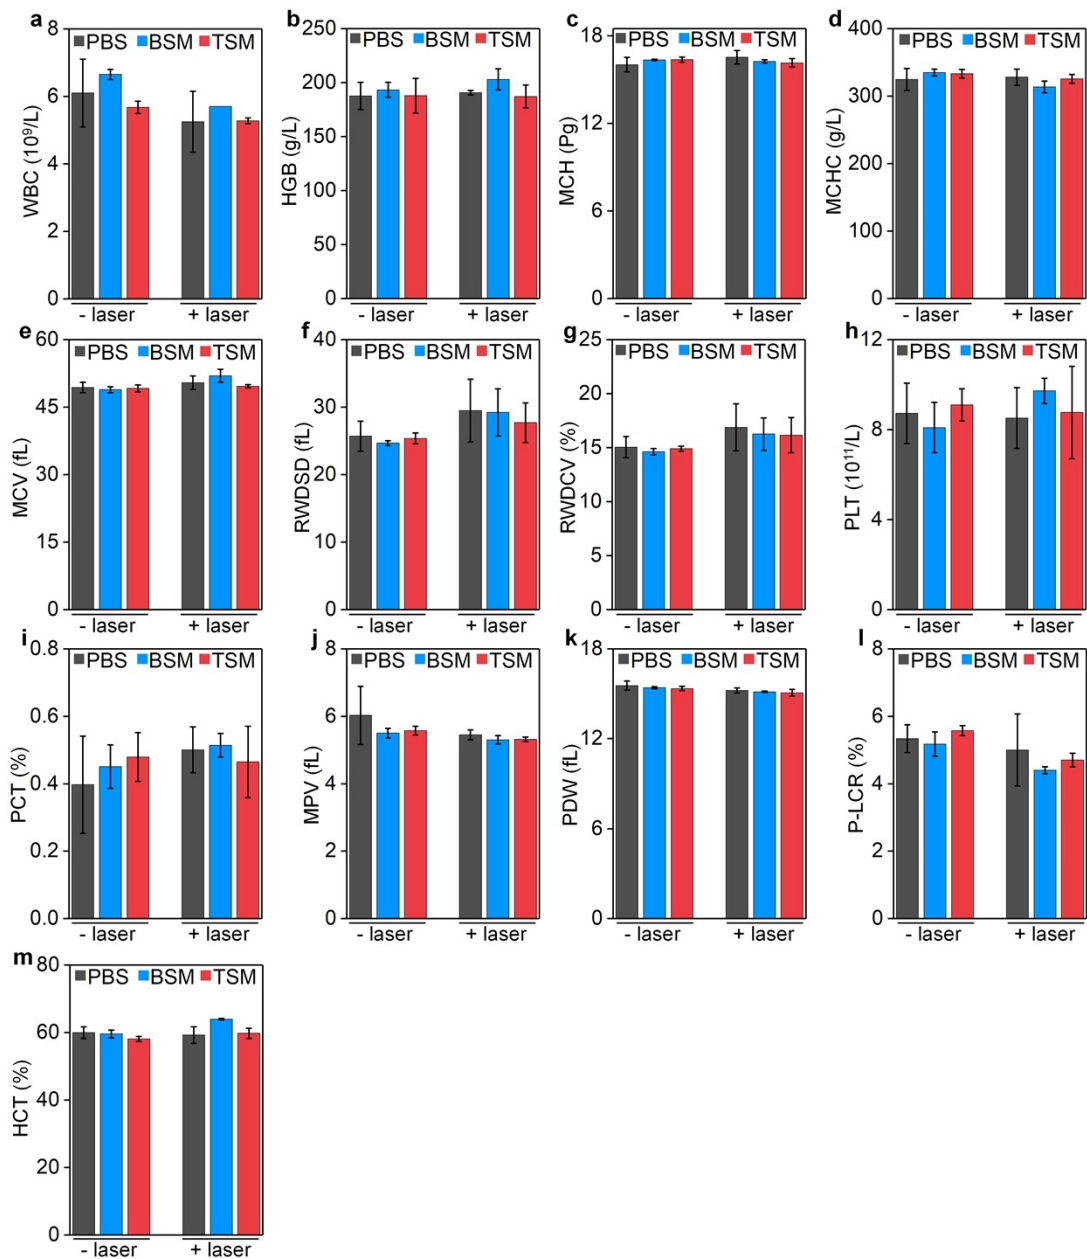

**Fig. S20.** The levels of (a) WBC, (b) HGB, (c) MCH, (d) MCHC, (e) MCV, (f) RWSD, (g) RWDCV, (h) PLT,

(i) PCT, (j) MPV, (k) PDW, (l) P-LCR, and (m) HCT in blood samples of mice.

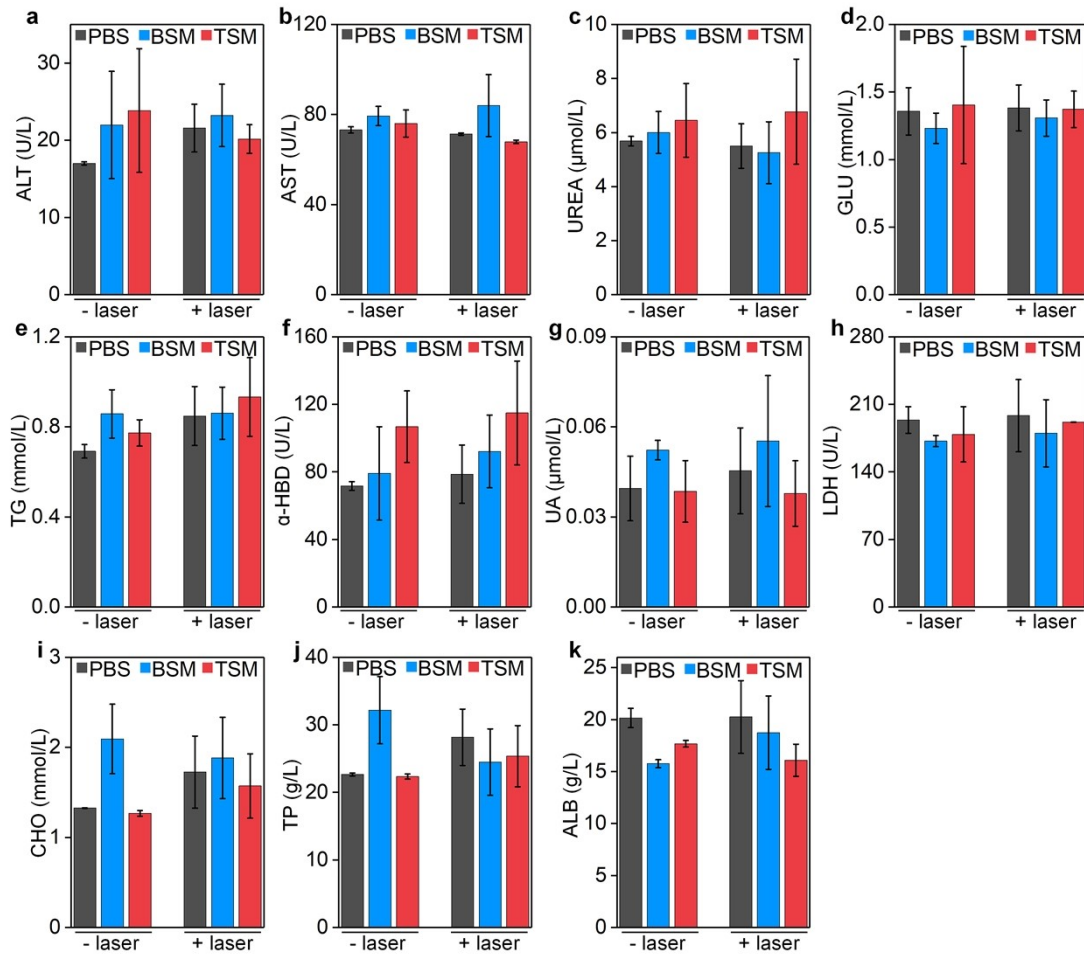

**Fig. S21.** The levels of (a) ALT, (b) AST, (c) UREA, (d) GLU, (e) TG, (f)  $\alpha$ -HBD, (g) UA, (h) LDH, (i) CHO, (j) TP and (k) ALB in blood samples of mice.
